# Supplementary material
Source: PubMed Central journal article supplement (PMC6358026)
Supplement: ry180226suppa1.pdf [file ry180226suppa1.pdf]

## Appendix E1: Search Strategy for PubMed

1. PubMed searched for “T1 mapping AND heart.” (No date limits set, last searched March 5th, 2018)
2. Citations exported to a database.
3. PubMed searched for “Native T1 AND heart.” (No date limits set, last searched March 5th, 2018)
4. Citations exported to previously generated database.
5. PubMed searched for “ECV AND heart.” (No date limits set, last searched March 5th, 2018)
6. Citations exported to previously generated database.
7. Duplicates were identified using PMID and removed.
8. Titles were screened. If study was obviously not applicable to the meta-analysis and systematic review based on title alone the citation was removed.
9. Abstracts were thoroughly reviewed for inclusion. If study was deemed to not meet inclusion criteria by data provided in the abstract the citation was removed.
10. Full references were thoroughly reviewed for inclusion.
11. Reference lists of eligible articles were reviewed to identify any additional articles.

## References of Articles Included in Meta-analysis and Systematic Review

- Messroghli DR, Plein S, Higgins DM, et al. Human myocardium: single-breath-hold MR T1 mapping with high spatial resolution--reproducibility study. *Radiology* 2006;238(3):1004–1012 .
- Messroghli DR, Greiser A, Fröhlich M, Dietz R, Schulz-Menger J. Optimization and validation of a fully-integrated pulse sequence for modified look-locker inversion-recovery (MOLLI) T1 mapping of the heart. *J Magn Reson Imaging* 2007;26(4):1081–1086 .
- Piechnik SK, Ferreira VM, Dall’Armellina E, et al. Shortened Modified Look-Locker Inversion recovery (ShMOLLI) for clinical myocardial T1-mapping at 1.5 and 3 T within a 9 heartbeat breathhold. *J Cardiovasc Magn Reson* 2010;12(1):69–79 .
- Nacif MS, Turkbey EB, Gai N, et al. Myocardial T1 mapping with MRI: comparison of look-locker and MOLLI sequences. *J Magn Reson Imaging* 2011;34(6):1367–1373 .
- Lee JJ, Liu S, Nacif MS, et al. Myocardial T1 and extracellular volume fraction mapping at 3 tesla. *J Cardiovasc Magn Reson* 2011;13(1):75–84 .
- Dass S, Suttie JJ, Piechnik SK, et al. Myocardial tissue characterization using magnetic resonance noncontrast t1 mapping in hypertrophic and dilated cardiomyopathy. *Circ Cardiovasc Imaging* 2012;5(6):726–733 .

Kawel N, Nacif M, Zavodni A, et al. T1 mapping of the myocardium: intra-individual assessment of post-contrast T1 time evolution and extracellular volume fraction at 3T for Gd-DTPA and Gd-BOPTA. *J Cardiovasc Magn Reson* 2012;14(1):26–34 .

Fontana M, White SK, Banyersad SM, et al. Comparison of T1 mapping techniques for ECV quantification. Histological validation and reproducibility of ShMOLLI versus multibreath-hold T1 quantification equilibrium contrast CMR. *J Cardiovasc Magn Reson* 2012;14(1):88–93 .

Liu S, Han J, Nacif MS, et al. Diffuse myocardial fibrosis evaluation using cardiac magnetic resonance T1 mapping: sample size considerations for clinical trials. *J Cardiovasc Magn Reson* 2012;14(1):90–97 .

Kellman P, Wilson JR, Xue H, et al. Extracellular volume fraction mapping in the myocardium, part 2: initial clinical experience. *J Cardiovasc Magn Reson* 2012;14(1):64–71 .

Ferreira VM, Piechnik SK, Dall'Armellina E, et al. Non-contrast T1-mapping detects acute myocardial edema with high diagnostic accuracy: a comparison to T2-weighted cardiovascular magnetic resonance. *J Cardiovasc Magn Reson* 2012;14(1):42–53 .

Ugander M, Oki AJ, Hsu LY, et al. Extracellular volume imaging by magnetic resonance imaging provides insights into overt and sub-clinical myocardial pathology. *Eur Heart J* 2012;33(10):1268–1278 .

Karamitsos TD, Piechnik SK, Banyersad SM, et al. Noncontrast T1 mapping for the diagnosis of cardiac amyloidosis. *JACC Cardiovasc Imaging* 2013;6(4):488–497 .

Liu CY, Liu YC, Wu C, et al. Evaluation of age-related interstitial myocardial fibrosis with cardiac magnetic resonance contrast-enhanced T1 mapping: MESA (Multi-Ethnic Study of Atherosclerosis). *J Am Coll Cardiol* 2013;62(14):1280–1287 .

Miller CA, Naish JH, Bishop P, et al. Comprehensive validation of cardiovascular magnetic resonance techniques for the assessment of myocardial extracellular volume. *Circ Cardiovasc Imaging* 2013;6(3):373–383 .

Sado DM, White SK, Piechnik SK, et al. Identification and assessment of Anderson-Fabry disease by cardiovascular magnetic resonance noncontrast myocardial T1 mapping. *Circ Cardiovasc Imaging* 2013;6(3):392–398 .

Rogers T, Dabir D, Mahmoud I, et al. Standardization of T1 measurements with MOLLI in differentiation between health and disease--the ConSept study. *J Cardiovasc Magn Reson* 2013;15(1):78–86 .

von Knobelsdorff-Brenkenhoff F, Prothmann M, Dieringer MA, et al. Myocardial T1 and T2 mapping at 3 T: reference values, influencing factors and implications. *J Cardiovasc Magn Reson* 2013;15(1):53–63 .

Bull S, White SK, Piechnik SK, et al. Human non-contrast T1 values and correlation with histology in diffuse fibrosis. *Heart* 2013;99(13):932–937 .

Salerno M, Janardhanan R, Jiji RS, et al. Comparison of methods for determining the partition coefficient of gadolinium in the myocardium using T1 mapping. *J Magn Reson Imaging* 2013;38(1):217–224 .

Puntmann VO, D’Cruz D, Smith Z, et al. Native myocardial T1 mapping by cardiovascular magnetic resonance imaging in subclinical cardiomyopathy in patients with systemic lupus erythematosus. *Circ Cardiovasc Imaging* 2013;6(2):295–301 .

Ferreira VM, Piechnik SK, Dall’Armellina E, et al. T(1) mapping for the diagnosis of acute myocarditis using CMR: comparison to T2-weighted and late gadolinium enhanced imaging. *JACC Cardiovasc Imaging* 2013;6(10):1048–1058 .

Piechnik SK, Ferreira VM, Lewandowski AJ, et al. Normal variation of magnetic resonance T1 relaxation times in the human population at 1.5 T using ShMOLLI. *J Cardiovasc Magn Reson* 2013;15(1):13–23 .

Puntmann VO, Voigt T, Chen Z, et al. Native T1 mapping in differentiation of normal myocardium from diffuse disease in hypertrophic and dilated cardiomyopathy. *JACC Cardiovasc Imaging* 2013;6(4):475–484 .

Fontana M, Banypersad SM, Treibel TA, et al. Native T1 mapping in transthyretin amyloidosis. *JACC Cardiovasc Imaging* 2014;7(2):157–165 .

Reiter U, Reiter G, Dorr K, Greiser A, Maderthaner R, Fuchsjäger M. Normal diastolic and systolic myocardial T1 values at 1.5-T MR imaging: correlations and blood normalization. *Radiology* 2014;271(2):365–372 .

Chin CW, Semple S, Malley T, et al. Optimization and comparison of myocardial T1 techniques at 3T in patients with aortic stenosis. *Eur Heart J Cardiovasc Imaging* 2014;15(5):556–565 .

Puntmann VO, Arroyo Ucar E, Hinojar Baydes R, et al. Aortic stiffness and interstitial myocardial fibrosis by native T1 are independently associated with left ventricular remodeling in patients with dilated cardiomyopathy. *Hypertension* 2014;64(4):762–768 .

Thuny F, Lovric D, Schnell F, et al. Quantification of myocardial extracellular volume fraction with cardiac MR imaging for early detection of left ventricle involvement in systemic sclerosis. *Radiology* 2014;271(2):373–380 .

Florian A, Ludwig A, Rösch S, Yildiz H, Sechtem U, Yilmaz A. Myocardial fibrosis imaging based on T1-mapping and extracellular volume fraction (ECV) measurement in muscular dystrophy patients: diagnostic value compared with conventional late gadolinium enhancement (LGE) imaging. *Eur Heart J Cardiovasc Imaging* 2014;15(9):1004–1012 .

Brouwer WP, Baars EN, Germans T, et al. In-vivo T1 cardiovascular magnetic resonance study of diffuse myocardial fibrosis in hypertrophic cardiomyopathy. *J Cardiovasc Magn Reson* 2014;16(1):28–34 .

Dabir D, Child N, Kalra A, et al. Reference values for healthy human myocardium using a T1 mapping methodology: results from the International T1 Multicenter cardiovascular magnetic resonance study. *J Cardiovasc Magn Reson* 2014;16(1):69–80 .

Ntusi NA, Piechnik SK, Francis JM, et al. Subclinical myocardial inflammation and diffuse fibrosis are common in systemic sclerosis--a clinical study using myocardial T1-mapping and extracellular volume quantification. *J Cardiovasc Magn Reson* 2014;16(1):21–32 .

Ferreira VM, Piechnik SK, Dall’Armellina E, et al. Native T1-mapping detects the location, extent and patterns of acute myocarditis without the need for gadolinium contrast agents. *J Cardiovasc Magn Reson* 2014;16(1):36–46 .

Kawel-Boehm N, Dellas Buser T, Greiser A, Bieri O, Bremerich J, Santini F. In-vivo assessment of normal T1 values of the right-ventricular myocardium by cardiac MRI. *Int J Cardiovasc Imaging* 2014;30(2):323–328 .

Radunski UK, Lund GK, Stehning C, et al. CMR in patients with severe myocarditis: diagnostic value of quantitative tissue markers including extracellular volume imaging. *JACC Cardiovasc Imaging* 2014;7(7):667–675 .

Kvernby S, Warntjes MJ, Haraldsson H, Carlhäll CJ, Engvall J, Ebberts T. Simultaneous three-dimensional myocardial T1 and T2 mapping in one breath hold with 3D-QALAS. *J Cardiovasc Magn Reson* 2014;16(1):102–115 .

Luetkens JA, Doerner J, Thomas DK, et al. Acute myocarditis: multiparametric cardiac MR imaging. *Radiology* 2014;273(2):383–392 .

Mahmod M, Piechnik SK, Levelt E, et al. Adenosine stress native T1 mapping in severe aortic stenosis: evidence for a role of the intravascular compartment on myocardial T1 values. *J Cardiovasc Magn Reson* 2014;16(1):92–99 .

Liu CY, Bluemke DA, Gerstenblith G, et al. Reference values of myocardial structure, function, and tissue composition by cardiac magnetic resonance in healthy African-Americans at 3T and their relations to serologic and cardiovascular risk factors. *Am J Cardiol* 2014;114(5):789–795 .

Hinojar R, Foote L, Sangle S, et al. Native T1 and T2 mapping by CMR in lupus myocarditis: Disease recognition and response to treatment. *Int J Cardiol* 2016;222:717–726 .

Lee SP, Lee W, Lee JM, et al. Assessment of diffuse myocardial fibrosis by using MR imaging in asymptomatic patients with aortic stenosis. *Radiology* 2015;274(2):359–369 .

Hong YJ, Park CH, Kim YJ, et al. Extracellular volume fraction in dilated cardiomyopathy patients without obvious late gadolinium enhancement: comparison with healthy control subjects. *Int J Cardiovasc Imaging* 2015;31(S1,Suppl 1):115–122 .

Fontana M, Banypersad SM, Treibel TA, et al. Differential myocyte responses in patients with cardiac transthyretin amyloidosis and light-chain amyloidosis: a cardiac MR imaging study. *Radiology* 2015;277(2):388–397 .

Chen YY, Zhang WG, Yang S, et al. Extracellular volume fraction in coronary chronic total occlusion patients. *Int J Cardiovasc Imaging* 2015;31(6):1211–1221 .

Banypersad SM, Fontana M, Maestrini V, et al. T1 mapping and survival in systemic light-chain amyloidosis. *Eur Heart J* 2015;36(4):244–251 .

Ertel A, Pratt D, Kellman P, et al. Increased myocardial extracellular volume in active idiopathic systemic capillary leak syndrome. *J Cardiovasc Magn Reson* 2015;17(1):76–83 .

Kuruvilla S, Janardhanan R, Antkowiak P, et al. Increased extracellular volume and altered mechanics are associated with LVH in hypertensive heart disease, not hypertension alone. *JACC Cardiovasc Imaging* 2015;8(2):172–180 .

Małek LA, Werys K, Kłopotowski M, et al. Native T1-mapping for non-contrast assessment of myocardial fibrosis in patients with hypertrophic cardiomyopathy--comparison with late enhancement quantification. *Magn Reson Imaging* 2015;33(6):718–724 .

aus dem Siepen F, Buss SJ, Messroghli D, et al. T1 mapping in dilated cardiomyopathy with cardiac magnetic resonance: quantification of diffuse myocardial fibrosis and comparison with endomyocardial biopsy. *Eur Heart J Cardiovasc Imaging* 2015;16(2):210–216 .

Edwards NC, Moody WE, Yuan M, et al. Diffuse interstitial fibrosis and myocardial dysfunction in early chronic kidney disease. *Am J Cardiol* 2015;115(9):1311–1317 .

McDiarmid AK, Broadbent DA, Higgins DM, et al. The effect of changes to MOLLI scheme on T1 mapping and extra cellular volume calculation in healthy volunteers with 3 tesla cardiovascular magnetic resonance imaging. *Quant Imaging Med Surg* 2015;5(4):503–510.

Mehta BB, Auger DA, Gonzalez JA, et al. Detection of elevated right ventricular extracellular volume in pulmonary hypertension using Accelerated and Navigator-Gated Look-Locker Imaging for Cardiac T1 Estimation (ANGIE) cardiovascular magnetic resonance. *J Cardiovasc Magn Reson* 2015;17(1):110–120 .

Zhang Y, Corona-Villalobos CP, Kiani AN, et al. Myocardial T2 mapping by cardiovascular magnetic resonance reveals subclinical myocardial inflammation in patients with systemic lupus erythematosus. *Int J Cardiovasc Imaging* 2015;31(2):389–397 .

Alam MH, Auger D, Smith GC, et al. T1 at 1.5T and 3T compared with conventional T2\* at 1.5T for cardiac siderosis. *J Cardiovasc Magn Reson* 2015;17(1):102–112 .

Ntusi NAB, Piechnik SK, Francis JM, et al. Diffuse myocardial fibrosis and inflammation in rheumatoid arthritis: insights from CMR T1 mapping. *JACC Cardiovasc Imaging* 2015;8(5):526–536 .

Singh A, Horsfield MA, Bekele S, Khan JN, Greiser A, McCann GP. Myocardial T1 and extracellular volume fraction measurement in asymptomatic patients with aortic stenosis: reproducibility and comparison with age-matched controls. *Eur Heart J Cardiovasc Imaging* 2015;16(7):763–770 .

Treibel TA, Zemrak F, Sado DM, et al. Extracellular volume quantification in isolated hypertension - changes at the detectable limits? *J Cardiovasc Magn Reson* 2015;17(1):74–84 .

Tessa C, Diciotti S, Landini N, et al. Myocardial T1 and T2 mapping in diastolic and systolic phase. *Int J Cardiovasc Imaging* 2015;31(5):1001–1010 .

Luetkens JA, Homsy R, Dabir D, et al. Comprehensive cardiac magnetic resonance for short-term follow-up in acute myocarditis. *J Am Heart Assoc* 2016;5(7):e003603 .

Mordi I, Carrick D, Bezerra H, Tzemos N. T1 and T2 mapping for early diagnosis of dilated non-ischaemic cardiomyopathy in middle-aged patients and differentiation from normal physiological adaptation. *Eur Heart J Cardiovasc Imaging* 2016;17(7):797–803 .

Levelt E, Mahmood M, Piechnik SK, et al. Relationship between left ventricular structural and metabolic remodeling in type 2 diabetes. *Diabetes* 2016;65(1):44–52.

Luetkens JA, Doerner J, Schwarze-Zander C, et al. Cardiac magnetic resonance reveals signs of subclinical myocardial inflammation in asymptomatic HIV-infected patients. *Circ Cardiovasc Imaging* 2016;9(3):e004091 .

- Mayr A, Kitterer D, Latus J, et al. Evaluation of myocardial involvement in patients with connective tissue disorders: a multi-parametric cardiovascular magnetic resonance study. *J Cardiovasc Magn Reson* 2016;18(1):67–79 .
- Luetkens JA, Homsy R, Sprinkart AM, et al. Incremental value of quantitative CMR including parametric mapping for the diagnosis of acute myocarditis. *Eur Heart J Cardiovasc Imaging* 2016;17(2):154–161 .
- Liu A, Wijesurendra RS, Francis JM, et al. Adenosine stress and rest T1 mapping can differentiate between ischemic, infarcted, remote, and normal myocardium without the need for gadolinium contrast agents. *JACC Cardiovasc Imaging* 2016;9(1):27–36 .
- Ntusi N, O'Dwyer E, Dorrell L, et al. HIV-1-related cardiovascular disease is associated with chronic inflammation, frequent pericardial effusions, and probable myocardial edema. *Circ Cardiovasc Imaging* 2016;9(3):e004430 .
- Görmeli CA, Görmeli G, Yağmur J, et al. Assessment of myocardial changes in athletes with native T1 mapping and cardiac functional evaluation using 3 T MRI. *Int J Cardiovasc Imaging* 2016;32(6):975–981 .
- Goebel J, Seifert I, Nensa F, et al. Can Native T1 mapping differentiate between healthy and diffuse diseased myocardium in clinical routine cardiac MR imaging? *PLoS One* 2016;11(5):e0155591 .
- Gao X, Liu M, Qu A, et al. Native magnetic resonance T1-mapping identifies diffuse myocardial injury in hypothyroidism. *PLoS One* 2016;11(3):e0151266 .
- Ferreira VM, Marcelino M, Piechnik SK, et al. Pheochromocytoma is characterized by catecholamine-mediated myocarditis, focal and diffuse myocardial fibrosis, and myocardial dysfunction. *J Am Coll Cardiol* 2016;67(20):2364–2374 .
- Kato S, Foppa M, Roujol S, et al. Left ventricular native T1 time and the risk of atrial fibrillation recurrence after pulmonary vein isolation in patients with paroxysmal atrial fibrillation. *Int J Cardiol* 2016;203:848–854 .
- Rauhalammi SM, Mangion K, Barrientos PH, et al. Native myocardial longitudinal (T1 ) relaxation time: Regional, age, and sex associations in the healthy adult heart. *J Magn Reson Imaging* 2016;44(3):541–548 .
- McDiarmid AK, Swoboda PP, Erhayiem B, et al. Athletic cardiac adaptation in males is a consequence of elevated myocyte mass. *Circ Cardiovasc Imaging* 2016;9(4):e003579.
- Teixeira T, Hafyane T, Stikov N, Akdeniz C, Greiser A, Friedrich MG. Comparison of different cardiovascular magnetic resonance sequences for native myocardial T1 mapping at 3T. *J Cardiovasc Magn Reson* 2016;18(1):65–76 .
- Chow K, Yang Y, Shaw P, Kramer CM, Salerno M. Robust free-breathing SASHA T1 mapping with high-contrast image registration. *J Cardiovasc Magn Reson* 2016;18(1):47–60 .
- Soslow JH, Damon SM, Crum K, et al. Increased myocardial native T1 and extracellular volume in patients with Duchenne muscular dystrophy. *J Cardiovasc Magn Reson* 2016;18(1):5–17 .

Hanneman K, Nguyen ET, Thavendiranathan P, et al. Quantification of myocardial extracellular volume fraction with cardiac MR imaging in thalassemia major. *Radiology* 2016;279(3):720–730 .

Rutherford E, Talle MA, Mangion K, et al. Defining myocardial tissue abnormalities in end-stage renal failure with cardiac magnetic resonance imaging using native T1 mapping. *Kidney Int* 2016;90(4):845–852 .

Chin CWL, Everett RJ, Kwiecinski J, et al. Myocardial fibrosis and cardiac decompensation in aortic stenosis. *JACC Cardiovasc Imaging* 2017;10(11):1320–1333 .

Cameron D, Siddiqi N, Neil CJ, et al. T<sub>1</sub> mapping for assessment of myocardial injury and microvascular obstruction at one week post myocardial infarction. *Eur J Radiol* 2016;85(1):279–285 .

Schmacht L, Traber J, Grieben U, et al. Cardiac Involvement in Myotonic Dystrophy Type 2 Patients With Preserved Ejection Fraction: Detection by Cardiovascular Magnetic Resonance. *Circ Cardiovasc Imaging* 2016;9(7):e004615 .

Zhao L, Li S, Ma X, et al. Systolic MOLLI T1 mapping with heart-rate-dependent pulse sequence sampling scheme is feasible in patients with atrial fibrillation. *J Cardiovasc Magn Reson* 2016;18(1):13–22 .

Bulluck H, Rosmini S, Abdel-Gadir A, et al. Automated extracellular volume fraction mapping provides insights into the pathophysiology of left ventricular remodeling post-reperused ST-elevation myocardial infarction. *J Am Heart Assoc* 2016;5(7):e003555 .

Weingärtner S, Meßner NM, Budjan J, et al. Myocardial T<sub>1</sub>-mapping at 3T using saturation-recovery: reference values, precision and comparison with MOLLI. *J Cardiovasc Magn Reson* 2016;18(1):84–93 .

Wu LM, Chen BH, Yao QY, et al. Quantitative diffusion-weighted magnetic resonance imaging in the assessment of myocardial fibrosis in hypertrophic cardiomyopathy compared with T1 mapping. *Int J Cardiovasc Imaging* 2016;32(8):1289–1297 .

van Ooij P, Allen BD, Contaldi C, et al. 4D flow MRI and T1 -Mapping: Assessment of altered cardiac hemodynamics and extracellular volume fraction in hypertrophic cardiomyopathy. *J Magn Reson Imaging* 2016;43(1):107–114 .

Roller FC, Wiedenroth C, Breithecker A, et al. Native T1 mapping and extracellular volume fraction measurement for assessment of right ventricular insertion point and septal fibrosis in chronic thromboembolic pulmonary hypertension. *Eur Radiol* 2017;27(5):1980–1991 .

Radunski UK, Lund GK, Säring D, et al. T1 and T2 mapping cardiovascular magnetic resonance imaging techniques reveal unapparent myocardial injury in patients with myocarditis. *Clin Res Cardiol* 2017;106(1):10–17 .

Blaszczyk E, Töpper A, Schmacht L, et al. Influence of spatial resolution and contrast agent dosage on myocardial T1 relaxation times. *MAGMA* 2017;30(1):85–91 .

Rodrigues JC, Amadu AM, Ghosh Dastidar A, et al. ECG strain pattern in hypertension is associated with myocardial cellular expansion and diffuse interstitial fibrosis: a multi-parametric cardiac magnetic resonance study. *Eur Heart J Cardiovasc Imaging* 2017;18(4):441–450 .

Bohnen S, Radunski UK, Lund GK, et al. T1 mapping cardiovascular magnetic resonance imaging to detect myocarditis-Impact of slice orientation on the diagnostic performance. *Eur J Radiol* 2017;86:6–12 .

Homsí R, Luetkens JA, Skowasch D, et al. Left ventricular myocardial fibrosis, atrophy, and impaired contractility in patients with pulmonary arterial hypertension and a preserved left ventricular function: a cardiac magnetic resonance study. *J Thorac Imaging* 2017;32(1):36–42 .

Hamilton JI, Jiang Y, Chen Y, et al. MR fingerprinting for rapid quantification of myocardial T<sub>1</sub>, T<sub>2</sub>, and proton spin density. *Magn Reson Med* 2017;77(4):1446–1458 .

Kvernby S, Warntjes M, Engvall J, Carlhäll CJ, Ebbers T. Clinical feasibility of 3D-QALAS - Single breath-hold 3D myocardial T<sub>1</sub>- and T<sub>2</sub>-mapping. *Magn Reson Imaging* 2017;38:13–20 .

Greulich S, Mayr A, Kitterer D, et al. Advanced myocardial tissue characterisation by a multi-component CMR protocol in patients with rheumatoid arthritis. *Eur Radiol* 2017;27(11):4639–4649 .

Liu JM, Liu A, Leal J, et al. Measurement of myocardial native T<sub>1</sub> in cardiovascular diseases and norm in 1291 subjects. *J Cardiovasc Magn Reson* 2017;19(1):74–83 .

Nordio G, Henningsson M, Chiribiri A, Villa ADM, Schneider T, Botnar RM. 3D myocardial T<sub>1</sub> mapping using saturation recovery. *J Magn Reson Imaging* 2017;46(1):218–227 .

Radunski UK, Fuger U, Bohnen S, et al. Asymptomatic cocaine abuse- myocardial tissue characterization using cardiac biomarkers and cardiovascular magnetic resonance imaging. *Circ J* 2017;81(5):701–708 .

von Knobelsdorff-Brenkenhoff F, Schüler J, Dogangüzel S, et al. Detection and monitoring of acute myocarditis applying quantitative cardiovascular magnetic resonance. *Circ Cardiovasc Imaging* 2017;10(2):e005242 .

Youn JC, Hong YJ, Lee HJ, et al. Contrast-enhanced T<sub>1</sub> mapping-based extracellular volume fraction independently predicts clinical outcome in patients with non-ischemic dilated cardiomyopathy: a prospective cohort study. *Eur Radiol* 2017;27(9):3924–3933 .

Chen YY, Yun H, Jin H, et al. Association of native T<sub>1</sub> times with biventricular function and hemodynamics in precapillary pulmonary hypertension. *Int J Cardiovasc Imaging* 2017;33(8):1179–1189 .

Bohnen S, Radunski UK, Lund GK, et al. Tissue characterization by T<sub>1</sub> and T<sub>2</sub> mapping cardiovascular magnetic resonance imaging to monitor myocardial inflammation in healing myocarditis. *Eur Heart J Cardiovasc Imaging* 2017;18(7):744–751 .

Wu LM, Wu R, Ou YR, et al. Fibrosis quantification in hypertensive heart disease with LVH and Non-LVH: findings from T<sub>1</sub> mapping and contrast-free cardiac diffusion-weighted imaging. *Sci Rep* 2017;7(1):559–567 .

Homsí R, Kuetting D, Sprinkart A, et al. Interrelations of epicardial fat volume, left ventricular T<sub>1</sub>-relaxation times and myocardial strain in hypertensive patients: a cardiac magnetic resonance study. *J Thorac Imaging* 2017;32(3):169–175 .



- Wang S, Hu H, Lu M, et al. Myocardial extracellular volume fraction quantified by cardiovascular magnetic resonance is increased in hypertension and associated with left ventricular remodeling. *Eur Radiol* 2017;27(11):4620–4630 .
- Puntmann VO, Isted A, Hinojar R, Foote L, Carr-White G, Nagel E. T1 and T2 mapping in recognition of early cardiac involvement in systemic sarcoidosis. *Radiology* 2017;285(1):63–72 .
- Greulich S, Mayr A, Kitterer D, et al. T1 and T2 mapping for evaluation of myocardial involvement in patients with ANCA-associated vasculitides. *J Cardiovasc Magn Reson* 2017;19(1):6–17 .
- Luetkens JA, Schlesinger-Irsch U, Kuetting DL, et al. Feature-tracking myocardial strain analysis in acute myocarditis: diagnostic value and association with myocardial oedema. *Eur Radiol* 2017;27(11):4661–4671 .
- Costello BT, Springer F, Hare JL, et al. SASHA versus ShMOLLI: a comparison of T1 mapping methods in health and dilated cardiomyopathy at 3 T. *Int J Cardiovasc Imaging* 2017;33(10):1551–1560 .
- Schwarz K, Ahearn T, Srinivasan J, et al. Alterations in cardiac deformation, timing of contraction and relaxation, and early myocardial fibrosis accompany the apparent recovery of acute stress-induced (Takotsubo) cardiomyopathy: an end to the concept of transience. *J Am Soc Echocardiogr* 2017;30(8):745–755 .
- Al-Wakeel-Marquard N, Rastin S, Muench F, et al. Cardiac T1 mapping in congenital heart disease: bolus vs. infusion protocols for measurements of myocardial extracellular volume fraction. *Int J Cardiovasc Imaging* 2017;33(12):1961–1968 .
- Wu R, An DA, Hu J, et al. The apparent diffusion coefficient is strongly correlated with extracellular volume, a measure of myocardial fibrosis, and subclinical cardiomyopathy in patients with systemic lupus erythematosus. *Acta Radiol* 2018;59(3):287–295  
<https://doi.org/10.1177/0284185117717763>.
- Zhou H, Lin X, Fang L, et al. Prolonged QTc indicates the clinical severity and poor prognosis in patients with isolated left ventricular non-compaction. *Int J Cardiovasc Imaging* 2017;33(12):2013–2020 .
- Mordi IR, Singh S, Rudd A, et al. Comprehensive echocardiographic and cardiac magnetic resonance evaluation differentiates among heart failure with preserved ejection fraction patients, hypertensive patients, and healthy control subjects. *JACC Cardiovasc Imaging* 2018;11(4):577–585 .
- Hromádka M, Seidlerová J, Suchý D, et al. Myocardial fibrosis detected by magnetic resonance in systemic sclerosis patients - Relationship with biochemical and echocardiography parameters. *Int J Cardiol* 2017;249:448–453 .
- Storz C, Hetterich H, Lorbeer R, et al. Myocardial tissue characterization by contrast-enhanced cardiac magnetic resonance imaging in subjects with prediabetes, diabetes, and normal controls with preserved ejection fraction from the general population. *Eur Heart J Cardiovasc Imaging* 2018;19(6):701–708 .
- Levelt E, Piechnik SK, Liu A, et al. Adenosine stress CMR T1-mapping detects early microvascular dysfunction in patients with type 2 diabetes mellitus without obstructive coronary

artery disease. *J Cardiovasc Magn Reson* 2017;19(1):81–90 [Published correction appears in *J Cardiovasc Magn Reson* 2017;19(1):99.] .

Tahir E, Starekova J, Muellerleile K, et al. Myocardial Fibrosis in Competitive Triathletes Detected by Contrast-Enhanced CMR Correlates With Exercise-Induced Hypertension and Competition History. *JACC Cardiovasc Imaging* 2018;11(9):1260–1270 .

Treibel TA, Kozor R, Menacho K, et al. Left ventricular hypertrophy revisited: cell and matrix expansion have disease-specific relationships. *Circulation* 2017;136(25):2519–2521 .

Heck SL, Gulati G, Hoffmann P, et al. Effect of candesartan and metoprolol on myocardial tissue composition during anthracycline treatment: the PRADA trial. *Eur Heart J Cardiovasc Imaging* 2018;19(5):544–552 .

Lee H, Park JB, Yoon YE, et al. Noncontrast myocardial T1 mapping by cardiac magnetic resonance predicts outcome in patients with aortic stenosis. *JACC Cardiovasc Imaging* 2018;11(7):974–983 .

Child N, Suna G, Dabir D, et al. Comparison of MOLLI, shMOLLI, and SASHA in discrimination between health and disease and relationship with histologically derived collagen volume fraction. *Eur Heart J Cardiovasc Imaging* 2018;19(7):768–776 .

Hanneman K, Crean AM, Wintersperger BJ, et al. The relationship between cardiovascular magnetic resonance imaging measurement of extracellular volume fraction and clinical outcomes in adults with repaired tetralogy of Fallot. *Eur Heart J Cardiovasc Imaging* 2018;19(7):777–784 .

Lin L, Li X, Feng J, et al. The prognostic value of T1 mapping and late gadolinium enhancement cardiovascular magnetic resonance imaging in patients with light chain amyloidosis. *J Cardiovasc Magn Reson* 2018;20(1):2–12 .

Scally C, Rudd A, Mezincescu A, et al. Persistent long-term structural, functional, and metabolic changes after stress-induced (Takotsubo) cardiomyopathy. *Circulation* 2018;137(10):1039–1048 .

Cao Y, Zeng W, Cui Y, et al. Increased myocardial extracellular volume assessed by cardiovascular magnetic resonance T1 mapping and its determinants in type 2 diabetes mellitus patients with normal myocardial systolic strain. *Cardiovasc Diabetol* 2018;17(1):7–18 .

Huber AT, Bravetti M, Lamy J, et al. Non-invasive differentiation of idiopathic inflammatory myopathy with cardiac involvement from acute viral myocarditis using cardiovascular magnetic resonance imaging T1 and T2 mapping. *J Cardiovasc Magn Reson* 2018;20(1):11–21 .

Zorach B, Shaw PW, Bourque J, et al. Quantitative cardiovascular magnetic resonance perfusion imaging identifies reduced flow reserve in microvascular coronary artery disease. *J Cardiovasc Magn Reson* 2018;20(1):14–21 .

**Table E1A: Native T1 Studies at 1.5 T**

| Author                   | Year | Method | Vendor  | FS (T) | Technique | Sequence    | FA (°) | N  | % Male | Age (years) | Native T1 Mean (ms) | SD (ms) |
|--------------------------|------|--------|---------|--------|-----------|-------------|--------|----|--------|-------------|---------------------|---------|
| Alam et al; subgroup 1   | 2015 | P      | Siemens | 1.5    | MOLLI     | 5 (3)3      | 35     | 20 | 45%    | 34          | 1014                | 22      |
| Al-Wakeel-Marquard et al | 2017 | P      | Philips | 1.5    | MOLLI     | 3 (3)3 (3)5 | 35     | 17 | 53%    | 24          | 995                 | 18      |
| ausdemSiepen et al       | 2015 | P      | Philips | 1.5    | MOLLI     | 3 (3)3 (3)5 | 35     | 56 | 66%    | 52          | 1020                | 40      |
| Banyspersad et al        | 2015 | P      | Siemens | 1.5    | ShMOLLI   | 5 (1)1 (1)  | 35     | 54 | 46%    | 46          | 954                 | 34      |
| Bohnen et al             | 2017 | P      | Philips | 1.5    | MOLLI     | 3 (3)5      | 35     | 13 | 85%    | 38          | 1039                | 16      |
| Bohnen et al             | 2017 | P      | Philips | 1.5    | MOLLI     | 3 (3)5      | 35     | 27 | 70%    | 40          | 1040                | 19      |
| Bull et al               | 2013 | P      | Siemens | 1.5    | ShMOLLI   | 5 (1)1 (1)1 | 35     | 33 | 64%    | 62          | 944                 | 16      |
| Bulluck et al            | 2016 | P      | Siemens | 1.5    | MOLLI     | 5 (3)3 (3)3 | 35     | 20 | 90%    | 60          | 1000                | 25      |
| Cao et al                | 2018 | P      | Siemens | 1.5    | MOLLI     | 5 (3)3      | 35     | 20 | 53%    | 54          | 1012                | 26      |
| Chen et al               | 2015 | P      | Siemens | 1.5    | MOLLI     | 5 (3)3      | 35     | 15 | 73%    | 54          | 1000                | 46      |
| Chen et al               | 2017 | P      | Siemens | 1.5    | MOLLI     | 5 (3)3      | 35     | 10 | 40%    | 38          | 1004                | 27      |
| Chow et at               | 2016 | P      | Siemens | 1.5    | MOLLI     | 5 (4)3      | 35     | 10 | 60%    | 33          | 943                 | 22      |
| Dabir et al; subgroup 1  | 2014 | P      | Philips | 1.5    | MOLLI     | 3 (3)3 (3)5 | 50     | 58 | 51%    | 44          | 952                 | 23      |
| Dabir et al; subgroup 3  | 2014 | P      | Philips | 1.5    | MOLLI     | 3 (3)3 (3)5 | 50     | 34 | 52%    | 41          | 950                 | 21      |
| Edwards et al            | 2015 | P      | Siemens | 1.5    | MOLLI     | 3 (3)3 (3)5 |        | 43 | 56%    | 57          | 955                 | 30      |
| Ertel et al              | 2015 | P      | Siemens | 1.5    | MOLLI     | 3 (3)3 (3)5 | 35     | 30 | 47%    | 52          | 971                 | 41      |
| Ferreira et al           | 2012 | P      | Siemens | 1.5    | ShMOLLI   | 5 (1)1 (1)1 | 35     | 21 | 38%    | 55          | 944                 | 17      |
| Ferreira et al           | 2013 | P      | Siemens | 1.5    | ShMOLLI   | 5 (1)1 (1)1 | 35     | 45 | 78%    | 42          | 941                 | 18      |
| Ferreira et al           | 2014 | P      | Siemens | 1.5    | ShMOLLI   | 5 (1)1 (1)1 | 35     | 50 | 74%    | 41          | 946                 | 23      |
| Ferreira et al           | 2016 | P      | Siemens | 1.5    | ShMOLLI   | 5 (1)1 (1)1 | 35     | 31 | 45%    | 50          | 954                 | 16      |
| Fontana et al            | 2014 | P      | Siemens | 1.5    | ShMOLLI   | 5 (1)1 (1)1 | 35     | 52 | 33%    | 46          | 967                 | 34      |
| Fontana et al            | 2015 | P      | Siemens | 1.5    | ShMOLLI   | 5 (1)1 (1)  | 35     | 47 | 45%    | 45          | 968                 | 36      |
| Goebel et al             | 2015 | R      | Siemens | 1.5    | MOLLI     | 5 (3)3      | 35     | 54 | 57%    | 48          | 955                 | 34      |
| Greulich et al           | 2017 | P      | Siemens | 1.5    | MOLLI     | 3 (3)3      | 35     | 20 |        |             | 952                 | 15      |
| Greulich et al           | 2017 | P      | Siemens | 1.5    | MOLLI     | 3 (3)3 (0)1 | 35     | 20 |        |             | 959                 | 21      |
| Hanneman et al           | 2016 | P      | Siemens | 1.5    | MOLLI     | 5 (3)3      | 35     | 10 | 50%    | 32          | 1006                | 34      |
| Hanneman et al           | 2017 | P      | Siemens | 1.5    | MOLLI     | 5 (3)3      | 35     | 10 | 50%    | 32          | 980                 | 51      |
| Heck et al               | 2017 | P      | Philips | 1.5    | MOLLI     | 3 (2)3 (2)5 | 35     | 69 | 0%     | 51          | 1005                | 32      |
| Homsí et al              | 2017 | P      | Philips | 1.5    | MOLLI     | 3 (3)3 (3)5 | 50     | 20 | 50%    | 63          | 968                 | 24      |
| Homsí et al              | 2017 | P      | Philips | 1.5    | MOLLI     | 3 (3)3 (3)5 | 35     | 25 | 52%    | 60          | 967                 | 17      |
| Huber et al              | 2018 | P      | Siemens | 1.5    | MOLLI     | 5 (3)3      | 35     | 20 | 45%    | 47          | 965                 | 25      |
| Karamitsos et al         | 2013 | P      | Siemens | 1.5    | ShMOLLI   | 5 (1)1 (1)1 | 35     | 36 | 61%    | 59          | 958                 | 20      |

|                                |      |   |         |     |         |             |    |      |      |    |      |    |
|--------------------------------|------|---|---------|-----|---------|-------------|----|------|------|----|------|----|
| Kato et al                     | 2016 | P | Philips | 1.5 | MOLLI   | 3 (3)3 (3)5 | 35 | 11   | 91%  | 57 | 1042 | 20 |
| Kawel-Boehm et al              | 2014 | P | Siemens | 1.5 | MOLLI   | 5 (3)3      | 35 | 20   | 55%  | 33 | 956  | 25 |
| Kellman et al                  | 2012 | P | Siemens | 1.5 | MOLLI   | 3 (3)3 (3)5 | 50 | 62   | 48%  | 43 | 965  | 35 |
| Knobelsdorff-Brenkenhoff et al | 2017 | P | Siemens | 1.5 | MOLLI   | 5 (3)3      | 35 | 18   | 78%  | 37 | 975  | 17 |
| Kuruville et al                | 2015 | P | Siemens | 1.5 | MOLLI   | 3 (3)5      | 35 | 22   | 32%  | 54 | 976  | 35 |
| Liu et al                      | 2013 | R | Siemens | 1.5 | MOLLI   | 3 (3)3 (3)5 | 35 | 1231 | 49%  | 67 | 977  | 42 |
| Liu et al                      | 2017 | R | Siemens | 1.5 | ShMOLLI | 5 (1)1 (1)1 | 35 | 70   | 64%  | 48 | 938  | 21 |
| Liu et al; subgroup 1          | 2016 | P | Siemens | 1.5 | ShMOLLI | 5 (1)1 (1)1 | 35 | 10   | 70%  | 32 | 954  | 19 |
| Luetkens et al                 | 2016 | P | Philips | 1.5 | MOLLI   | 3 (3)3 (3)5 | 50 | 50   | 60%  | 39 | 967  | 28 |
| Luetkens et al                 | 2016 | P | Philips | 1.5 | MOLLI   | 3 (3)3 (3)5 | 50 | 45   | 62%  | 40 | 965  | 28 |
| Luetkens et al                 | 2017 | P | Philips | 1.5 | MOLLI   | 3 (3)3 (3)5 | 50 | 35   | 66%  | 41 | 967  | 31 |
| Malek et al                    | 2015 | P | Siemens | 1.5 | ShMOLLI | 5 (1)1 (1)1 | 35 | 20   | 60%  | 27 | 939  | 22 |
| Mayr et al                     | 2016 | P | Siemens | 1.5 | MOLLI   | 3 (3)3 (3)5 |    | 20   |      |    | 962  | 15 |
| Mehta et al                    | 2015 | P | Siemens | 1.5 | MOLLI   | 5 (4)3      | 35 | 10   | 80%  | 24 | 971  | 14 |
| Messroghli et al               | 2006 | P | Philips | 1.5 | MOLLI   | 3 (3)3 (3)5 | 50 | 15   | 60%  | 33 | 977  | 63 |
| Messroghli et al               | 2007 | P | Siemens | 1.5 | MOLLI   | 3 (3)3 (3)5 | 50 | 20   | 55%  | 24 | 939  | 24 |
| Miller et al                   | 2013 | P | Siemens | 1.5 | MOLLI   | 3 (3)3 (3)5 | 35 | 30   | 50%  | 45 | 1045 | 47 |
| Mordi et al                    | 2016 | P | Siemens | 1.5 | MOLLI   | 3 (3)3 (3)5 | 35 | 21   | 100% | 48 | 952  | 31 |
| Nacif et al                    | 2011 | P | Siemens | 1.5 | MOLLI   | 3 (3)3 (3)5 | 35 | 14   | 57%  | 38 | 1034 | 56 |
| Nordio et al                   | 2017 | P | Philips | 1.5 | MOLLI   | 3 (3)3 (3)5 | 35 | 10   |      |    | 881  | 32 |
| Ntusi et al                    | 2014 | P | Siemens | 1.5 | ShMOLLI | 5 (1)1 (1)1 | 35 | 20   | 5%   | 56 | 958  | 20 |
| Ntusi et al                    | 2015 | P | Siemens | 1.5 | ShMOLLI | 5 (1)1 (1)1 | 35 | 39   | 72%  | 49 | 961  | 18 |
| Ntusi et al                    | 2016 | P | Siemens | 1.5 | ShMOLLI | 5 (1)1 (1)1 | 35 | 92   | 58%  | 44 | 956  | 24 |
| Piechnik et al                 | 2013 | P | Siemens | 1.5 | ShMOLLI | 5 (1)1 (1)1 | 35 | 342  | 49%  | 38 | 962  | 25 |
| Piechnik et al; subgroup 1     | 2010 | P | Siemens | 1.5 | ShMOLLI | 5 (1)1 (1)1 | 35 | 10   | 70%  | 35 | 966  | 48 |
| Piechnik et al; subgroup 2     | 2010 | P | Siemens | 1.5 | MOLLI   | 3 (3)3 (3)5 | 35 | 10   | 70%  | 35 | 976  | 46 |
| Radunski et al                 | 2014 | P | Philips | 1.5 | MOLLI   | 3 (3)3 (3)5 | 35 | 21   | 81%  | 34 | 1051 | 22 |
| Radunski et al                 | 2017 | P | Philips | 1.5 | MOLLI   | 3 (3)5      | 35 | 20   | 80%  | 37 | 1051 | 16 |
| Radunski et al                 | 2017 | P | Philips | 1.5 | MOLLI   | 3 (3)5      | 35 | 20   | 90%  | 31 | 1055 | 24 |
| Rauhalammi et al; subgroup 1   | 2016 | P | Siemens | 1.5 | MOLLI   | 3 (3)3 (3)5 | 50 | 84   | 49%  | 58 | 944  | 25 |
| Reiter et al                   | 2004 | P | Siemens | 1.5 | MOLLI   | 5 (4)2      | 35 | 40   | 50%  | 28 | 984  | 28 |
| Rodrigues et al                | 2017 | P | Siemens | 1.5 | MOLLI   | 3 (3)3 (3)5 | 35 | 29   | 60%  | 46 | 1024 | 41 |
| Rogers et al; subgroup 1       | 2013 | P | Philips | 1.5 | MOLLI   | 3 (3)3 (3)5 | 50 | 38   | 65%  | 49 | 952  | 41 |
| Roller et al                   | 2017 | P | Siemens | 1.5 | MOLLI   | 3 (3)3 (3)5 | 35 | 24   | 50%  | 61 | 957  | 24 |
| Sado et al                     | 2015 | P | Siemens | 1.5 | ShMOLLI | 5 (1)1 (1)1 | 35 | 67   | 45%  | 46 | 968  | 32 |

|                           |      |   |         |     |         |             |    |    |      |    |      |    |
|---------------------------|------|---|---------|-----|---------|-------------|----|----|------|----|------|----|
| Salerno et al; subgroup 1 | 2012 | P | Siemens | 1.5 | MOLLI   | 3 (3)5      | 35 | 10 |      | 34 | 966  | 31 |
| Salerno et al; subgroup 2 | 2012 | P | Siemens | 1.5 | MOLLI   | 3 (3)3 (3)5 | 35 | 10 |      | 34 | 974  | 22 |
| Schmacht et al            | 2016 | P | Siemens | 1.5 | MOLLI   | 5 (3)3      | 50 | 17 | 29%  | 54 | 992  | 28 |
| Soslow et al              | 2016 | P | Siemens | 1.5 | MOLLI   | 5 (3)3      | 35 | 11 | 100% | 25 | 988  | 14 |
| Tahir et al               | 2017 | P | Philips | 1.5 | MOLLI   | 5 (3)3      |    | 36 | 61%  | 42 | 1032 | 26 |
| Tessa et al               | 2015 | P | Siemens | 1.5 | MOLLI   | 5 (3)3      | 35 | 22 | 86%  | 42 | 961  | 28 |
| Treibel et al             | 2015 | P | Siemens | 1.5 | ShMOLLI | 5 (1)1 (1)  |    | 50 | 52%  | 45 | 955  | 30 |
| Zhang et al               | 2015 | P | Siemens | 1.5 | MOLLI   | 3 (3)3 (3)5 |    | 12 | 50%  | 50 | 964  | 33 |
| Zorach et al              | 2018 | P | Siemens | 1.5 | MOLLI   | 5 (4)3      | 35 | 20 | 26%  | 58 | 987  | 35 |

Note.—Table of all native T1 studies at 1.5T. Method = recruitment method, P = prospectively recruited, R = retrospectively recruited, FS = field strength, Technique = pulse sequence scheme, MOLLI = Modified Look-Locker Inversion Recovery, ShMOLLI = Shortened Modified Look-Locker Inversion Recovery, Sequence = number of phases (number of heartbeats), FA = flip angle, N = number of subjects in study, SD = standard deviation.

**Table E1B: Native T1 Studies at 3.0 T**

| Author                         | Year | Method | Vendor  | FS (T) | Technique | Sequence    | FA (°) | N  | % Male | Age (years) | Native T1 Mean (ms) | SD (ms) |
|--------------------------------|------|--------|---------|--------|-----------|-------------|--------|----|--------|-------------|---------------------|---------|
| Alam et al; subgroup 2         | 2015 | P      | Siemens | 3      | MOLLI     | 3 (3)5      | 35     | 20 | 45%    | 34          | 1165                | 28      |
| Blaszczyk et al                | 2017 | P      | Siemens | 3      | MOLLI     | 3 (3)3 (3)5 | 35     | 29 | 45%    | 52          | 1133                | 29      |
| Cameron et al                  | 2016 | P      | Philips | 3      | MOLLI     | 3 (3)3 (3)5 | 35     | 10 | 60%    | 59          | 1192                | 30      |
| Child et al                    | 2017 | P      | Philips | 3      | MOLLI     | 3 (3)3 (2)5 | 50     | 26 | 42%    | 53          | 1055                | 20      |
| Chin et al                     | 2014 | P      | Siemens | 3      | MOLLI     | 3 (3)3 (3)5 | 35     | 20 | 50%    | 55          | 1180                | 28      |
| Chin et al                     | 2017 | P      | Siemens | 3      | MOLLI     | 3 (3)3 (3)5 | 50     | 37 | 65%    | 68          | 1166                | 27      |
| Costello et al                 | 2017 | P      | Siemens | 3      | ShMOLLI   | 5 (1)1 (1)1 | 35     | 57 | 51%    | 48          | 1123                | 47      |
| Dabir et al; subgroup 2        | 2014 | P      | Philips | 3      | MOLLI     | 3 (3)3 (3)5 | 50     | 55 | 51%    | 44          | 1053                | 24      |
| Dabir et al; subgroup 4        | 2014 | P      | Philips | 3      | MOLLI     | 3 (3)3 (3)5 | 50     | 32 | 52%    | 41          | 1052                | 23      |
| Dass et al                     | 2012 | P      | Siemens | 3      | ShMOLLI   | 5 (1)1 (1)1 | 35     | 12 | 58%    | 52          | 1178                | 13      |
| Gao et al                      | 2016 | P      | Siemens | 3      | MOLLI     | 3 (3)3 (3)5 | 50     | 23 | 0%     | 35          | 1066                | 48      |
| Gormeli et al                  | 2016 | P      | Siemens | 3      | MOLLI     | 3 (3)3 (3)5 | 35     | 41 | 63%    | 24          | 1174                | 36      |
| Hamilton et al                 | 2017 | P      | Siemens | 3      | MOLLI     | 3 (3)3 (3)5 |        | 11 |        |             | 1247                | 65      |
| Hinojar et al                  | 2016 | P      | Philips | 3      | MOLLI     | 3 (3)3 (3)5 | 50     | 46 | 20%    | 42          | 1057                | 23      |
| Hong et al                     | 2015 | P      | Siemens | 3      | MOLLI     | 3 (3)3 (3)5 | 35     | 10 | 70%    | 54          | 1205                | 37      |
| Hromadka et al                 | 2017 | P      | Siemens | 3      | MOLLI     | 5 (3)3      | 35     | 20 | 50%    | 54          | 1192                | 33      |
| Kawel et al                    | 2012 | P      | Siemens | 3      | MOLLI     | 3 (3)3 (3)5 | 35     | 24 | 33%    | 28          | 1273                | 39      |
| Knobelsdorff-Brenkenhoff et al | 2013 | P      | Siemens | 3      | MOLLI     | 3 (3)5      | 35     | 60 | 50%    | 48          | 1159                | 46      |
| Kvernby et al                  | 2014 | P      | Philips | 3      | MOLLI     | 3 (3)3 (3)5 | 50     | 10 | 90%    | 34          | 1089                | 54      |
| Kvernby et al                  | 2017 | P      | Philips | 3      | MOLLI     | 3 (3)3 (3)5 | 35     | 10 | 60%    | 38          | 1145                | 10      |

|                              |      |   |         |   |         |             |    |     |      |    |      |    |
|------------------------------|------|---|---------|---|---------|-------------|----|-----|------|----|------|----|
| Lee et al                    | 2015 | P | Siemens | 3 | MOLLI   | 3 (3)5      |    | 15  | 60%  | 33 | 1169 | 21 |
| Lee et al                    | 2017 | P | Siemens | 3 | MOLLI   | 3 (3)5      |    | 33  | 48%  | 69 | 1185 | 37 |
| Lee et al; subgroup 1        | 2011 | P | Siemens | 3 | MOLLI   | 3 (3)5      | 35 | 11  | 45%  | 36 | 1314 | 39 |
| Lee et al; subgroup 2        | 2011 | P | Siemens | 3 | MOLLI   | 3 (3)3 (3)5 | 35 | 11  | 45%  | 36 | 1324 | 48 |
| Levelt et al                 | 2016 | P | Siemens | 3 | MOLLI   | 3 (3)3 (3)5 | 35 | 20  | 45%  | 54 | 1184 | 28 |
| Levelt et al                 | 2017 | P | Siemens | 3 | ShMOLLI | 5 (1)1 (1)1 | 35 | 16  | 53%  | 51 | 1194 | 26 |
| Lin et al                    | 2018 | P | Siemens | 3 | MOLLI   | 5 (3)3      | 20 | 20  | 50%  | 53 | 1283 | 46 |
| Liu et al                    | 2014 | P | Siemens | 3 | MOLLI   | 3 (3)3 (3)5 | 50 | 92  | 41%  | 37 | 1232 | 28 |
| Liu et al; subgroup 2        | 2016 | P | Siemens | 3 | ShMOLLI | 5 (1)1 (1)1 | 35 | 10  | 70%  | 36 | 1189 | 34 |
| Luetkens et al               | 2014 | P | Philips | 3 | MOLLI   | 3 (3)3 (3)5 | 50 | 42  | 64%  | 39 | 1089 | 45 |
| Luetkens et al               | 2016 | P | Philips | 3 | MOLLI   | 3 (3)3 (3)5 | 50 | 22  | 68%  | 45 | 1087 | 55 |
| Mahmod et al                 | 2014 | P | Siemens | 3 | ShMOLLI | 5 (1)1 (1)1 | 35 | 16  | 53%  | 63 | 1168 | 27 |
| McDiarmid et al              | 2016 | P | Philips | 3 | MOLLI   | 5 (3)3      | 35 | 15  | 100% | 30 | 1202 | 33 |
| McDiarmid et al; subgroup 1  | 2015 | P | Philips | 3 | MOLLI   | 3 (3)3 (3)5 | 50 | 10  | 70%  | 27 | 1159 | 33 |
| McDiarmid et al; subgroup 2  | 2015 | P | Philips | 3 | MOLLI   | 4 (3)3 (3)2 | 50 | 10  | 70%  | 27 | 1168 | 24 |
| McDiarmid et al; subgroup 3  | 2015 | P | Philips | 3 | MOLLI   | 5 (3)3      | 50 | 10  | 70%  | 27 | 1171 | 26 |
| McDiarmid et al; subgroup 4  | 2015 | P | Philips | 3 | MOLLI   | 4 (3)3 (3)2 | 35 | 10  | 70%  | 27 | 1182 | 23 |
| McDiarmid et al; subgroup 5  | 2015 | P | Philips | 3 | MOLLI   | 3 (3)3 (3)5 | 35 | 10  | 70%  | 27 | 1185 | 23 |
| McDiarmid et al; subgroup 6  | 2015 | P | Philips | 3 | MOLLI   | 5 (3)3      | 35 | 10  | 70%  | 27 | 1189 | 33 |
| Mordi et al                  | 2017 | P | Philips | 3 | MOLLI   | 3 (3)3 (3)5 | 35 | 28  | 50%  | 68 | 1194 | 29 |
| Piechnik et al; subgroup 3   | 2010 | P | Siemens | 3 | ShMOLLI | 5 (1)1 (1)1 | 35 | 10  | 70%  | 35 | 1166 | 62 |
| Piechnik et al; subgroup 4   | 2010 | P | Siemens | 3 | MOLLI   | 3 (3)3 (3)5 | 35 | 10  | 70%  | 35 | 1169 | 45 |
| Puntmann et al               | 2013 | P | Philips | 3 | MOLLI   | 3 (3)5      | 50 | 21  | 23%  | 38 | 1056 | 27 |
| Puntmann et al               | 2013 | P | Philips | 3 | MOLLI   | 3 (3)3 (3)5 | 50 | 30  | 63%  | 43 | 1070 | 55 |
| Puntmann et al               | 2014 | P | Philips | 3 | MOLLI   | 3 (3)5      | 50 | 47  | 52%  | 51 | 1055 | 22 |
| Puntmann et al               | 2017 | P | Philips | 3 | MOLLI   | 3 (3)3 (3)5 | 50 | 36  | 39%  | 43 | 1052 | 25 |
| Rauhalammi et al; subgroup 2 | 2016 | P | Siemens | 3 | MOLLI   | 3 (3)3 (3)5 | 50 | 84  | 49%  | 45 | 1154 | 26 |
| Rogers et al; subgroup 2     | 2013 | P | Philips | 3 | MOLLI   | 3 (3)3 (3)5 | 50 | 38  | 65%  | 49 | 1087 | 60 |
| Rutherford et al             | 2016 | P | Siemens | 3 | MOLLI   |             | 35 | 28  | 57%  | 60 | 1154 | 32 |
| Scally et al                 | 2018 | P | Philips | 3 | MOLLI   | 3 (3)3 (3)5 | 50 | 37  | 3%   | 64 | 1184 | 10 |
| Schwarz et al                | 2017 | P | Philips | 3 | MOLLI   | 3 (3)3 (3)5 | 50 | 44  | 10%  | 67 | 1189 | 16 |
| Singh et al                  | 2015 | P | Siemens | 3 | MOLLI   | 3 (3)3 (3)5 | 50 | 22  | 68%  | 68 | 1092 | 34 |
| Storz et al                  | 2017 | P | Siemens | 3 | MOLLI   | 5 (3)3      | 35 | 218 | 50%  | 54 | 1202 | 46 |
| Teixeira et al; subgroup 1   | 2016 | P | Siemens | 3 | ShMOLLI | 5 (1)1 (1)1 | 35 | 40  | 45%  | 59 | 1174 | 37 |
| Teixeira et al; subgroup 2   | 2016 | P | Siemens | 3 | MOLLI   | 5 (3)3      | 35 | 40  | 45%  | 59 | 1199 | 28 |

|                   |      |   |         |   |       |             |    |    |     |    |      |    |
|-------------------|------|---|---------|---|-------|-------------|----|----|-----|----|------|----|
| Weingartner et al | 2016 | P | Siemens | 3 | MOLLI | 5 (3)3      | 35 | 20 | 50% | 27 | 1183 | 36 |
| Wu et al          | 2016 | P | Philips | 3 | MOLLI | 3 (3)3 (3)5 | 35 | 14 | 57% | 51 | 1115 | 37 |
| Wu et al          | 2017 | P | Philips | 3 | MOLLI | 5 (3)3      | 35 | 12 | 33% | 56 | 1134 | 27 |
| Wu et al          | 2018 | P | Philips | 3 | MOLLI |             | 35 | 12 | 42% |    | 1115 | 37 |
| Youn et al        | 2017 | P | Siemens | 3 | MOLLI | 3 (3)3 (3)5 | 35 | 19 | 65% | 54 | 1214 | 37 |
| Zhao et al        | 2016 | P | Siemens | 3 | MOLLI | 5 (3)3      | 35 | 13 | 77% | 53 | 1248 | 32 |
| Zhou et al        | 2017 | P | Philips | 3 | MOLLI | 5 (3)3      | 35 | 14 | 64% | 45 | 1096 | 42 |

Note.—Table of all native T1 studies at 3.0 T. Method = recruitment method, P = prospectively recruited, R = retrospectively recruited, FS = field strength, Technique = pulse sequence scheme, MOLLI = Modified Look-Locker Inversion Recovery, ShMOLLI = Shortened Modified Look-Locker Inversion Recovery, Sequence = number of phases (number of heartbeats), FA = flip angle, N = number of subjects in study, SD = standard deviation.

## Table E2: ECV Studies

### A. ECV Studies at 1.5 T

| Author                   | Year | Method | Vendor  | FS (T) | Technique | Sequence    | FA (°) | PC Time (min) | Contrast   | Dose (mmol/kg) | N  | % Male | Age (years) | ECV Mean (%) | SD (%) |
|--------------------------|------|--------|---------|--------|-----------|-------------|--------|---------------|------------|----------------|----|--------|-------------|--------------|--------|
| Al-Wakeel-Marquard et al | 2017 | P      | Philips | 1.5    | MOLLI     | 3 (3)3 (3)5 | 35     | 15            | Dotarem    | 0.1            | 17 | 53%    | 24          | 26.0         | 2.0    |
| aus dem Siepen et al     | 2015 | P      | Philips | 1.5    | MOLLI     | 3 (3)3 (3)5 | 35     | 10            | Magnevist  | 0.2            | 56 | 66%    | 52          | 23.0         | 3.0    |
| Banyspersad et al        | 2015 | P      | Siemens | 1.5    | ShMOLLI   | 5 (1)1 (1)  | 35     | 15            | Dotarem    | 0.1            | 54 | 46%    | 46          | 25.0         | 2.0    |
| Bohnen et al             | 2017 | P      | Philips | 1.5    | MOLLI     | 3 (3)5      | 35     | 15            | Multihance | 0.075          | 13 | 85%    | 38          | 25.0         | 1.0    |
| Bohnen et al             | 2017 | P      | Philips | 1.5    | MOLLI     | 3 (3)5      | 35     | 15            | Multihance | 0.08           | 27 | 70%    | 40          | 25.0         | 1.0    |
| Brouwer et al            | 2014 | P      | Siemens | 1.5    | MOLLI     | 3 (3)3 (3)5 | 50     | 14            | Magnevist  | 0.2            | 14 | 57%    | 48          | 26.0         | 2.0    |
| Bulluck et al            | 2016 | P      | Siemens | 1.5    | MOLLI     | 5 (3)3 (3)3 | 35     | 15            | Dotarem    | 0.1            | 20 | 90%    | 60          | 26.4         | 2.1    |
| Cao et al                | 2018 | P      | Siemens | 1.5    | MOLLI     | 5 (3)3      | 35     | 15            | Magnevist  | 0.2            | 20 | 53%    | 54          | 24.6         | 2.2    |
| Chen et al               | 2015 | P      | Siemens | 1.5    | MOLLI     | 5 (3)3      | 35     | 15            | Magnevist  | 0.2            | 15 | 73%    | 54          | 23.3         | 2.0    |
| Dabir et al; subgroup 1  | 2014 | P      | Philips | 1.5    | MOLLI     | 3 (3)3 (3)5 | 50     | 18            | Gadovist   | 0.15           | 58 | 51%    | 44          | 26.0         | 6.0    |
| Dabir et al; subgroup 2  | 2014 | P      | Philips | 1.5    | MOLLI     | 3 (3)3 (3)5 | 50     | 18            | Gadovist   | 0.15           | 34 | 52%    | 41          | 25.0         | 4.0    |
| Edwards et al            | 2015 | P      | Siemens | 1.5    | MOLLI     | 3 (3)3 (3)5 |        | 17.5          | Gadovist   | 0.15           | 43 | 56%    | 57          | 25.0         | 3.0    |
| Ertel et al              | 2015 | P      | Siemens | 1.5    | MOLLI     | 3 (3)3 (3)5 | 35     | 15            | Magnevist  | 0.15           | 30 | 47%    | 52          | 26.0         | 2.4    |
| Florian et al            | 2014 | P      | Siemens | 1.5    | MOLLI     | 3 (3)5      | 35     | 17.5          | Magnevist  | 0.15           | 17 | 100%   | 33          | 24.0         | 2.0    |
| Fontana et al            | 2012 | P      | Siemens | 1.5    | ShMOLLI   | 5 (1)1 (1)  | 35     | 62.5          | Dotarem    | 0.1            | 50 | 53%    | 47          | 27.0         | 3.0    |
| Fontana et al            | 2015 | P      | Siemens | 1.5    | ShMOLLI   | 5 (1)1 (1)  | 35     | 62.5          | Dotarem    | 0.1            | 47 | 45%    | 45          | 27.0         | 3.0    |
| Greulich et al           | 2017 | P      | Siemens | 1.5    | MOLLI     | 3 (3)3      | 35     | 20            | Magnevist  | 0.15           | 20 |        |             | 24.5         | 1.0    |
| Greulich et al           | 2017 | P      | Siemens | 1.5    | MOLLI     | 3 (3)3 (0)1 | 35     | 20            | Magnevist  | 0.15           | 20 |        |             | 25.0         | 1.1    |
| Hanneman et al           | 2016 | P      | Siemens | 1.5    | MOLLI     | 5 (3)3      | 35     | 10            | Gadovist   | 0.2            | 10 | 50%    | 32          | 27.1         | 3.1    |
| Hanneman et al           | 2017 | P      | Siemens | 1.5    | MOLLI     | 5 (3)3      | 35     | 15            | Gadovist   | 0.2            | 10 | 50%    | 32          | 24.9         | 4.0    |

|                                |      |   |         |     |         |             |    |      |            |       |      |      |    |      |     |
|--------------------------------|------|---|---------|-----|---------|-------------|----|------|------------|-------|------|------|----|------|-----|
| Heck et al                     | 2017 | P | Philips | 1.5 | MOLLI   | 3 (2)3 (2)5 | 35 | 15   | Dotarem    | 0.2   | 69   | 0%   | 51 | 27.5 | 2.7 |
| Homsí et al                    | 2017 | P | Philips | 1.5 | MOLLI   | 3 (3)3 (3)5 | 50 | 10   | Gadovist   | 0.2   | 20   | 50%  | 63 | 28.0 | 3.8 |
| Huber et al                    | 2018 | P | Siemens | 1.5 | MOLLI   | 5 (3)3      | 35 | 15   | Multihance | 0.2   | 20   | 45%  | 47 | 22.0 | 3.0 |
| Kellman et al                  | 2012 | P | Siemens | 1.5 | MOLLI   | 3 (3)3 (3)5 | 50 | 17.5 | Magnevist  | 0.15  | 62   | 48%  | 43 | 25.4 | 2.5 |
| Knobelsdorff-Brenkenhoff et al | 2017 | P | Siemens | 1.5 | MOLLI   | 5 (3)3      | 35 | 10   | Gadovist   | 0.15  | 18   | 78%  | 37 | 27.1 | 6.0 |
| Kuruvilla et al                | 2015 | P | Siemens | 1.5 | MOLLI   | 3 (3)5      | 35 | 15   | Magnevist  | 0.15  | 22   | 32%  | 54 | 26.0 | 2.0 |
| Liu et al                      | 2013 | R | Siemens | 1.5 | MOLLI   | 3 (3)3 (3)5 | 35 | 25   | Magnevist  | 0.15  | 1231 | 49%  | 67 | 27.0 | 2.9 |
| Luetkens et al                 | 2016 | P | Philips | 1.5 | MOLLI   | 3 (3)3 (3)5 | 50 | 11   | Gadovist   | 0.2   | 50   | 60%  | 39 | 27.7 | 6.0 |
| Luetkens et al                 | 2016 | P | Philips | 1.5 | MOLLI   | 3 (3)3 (3)5 | 50 | 10   | Gadovist   | 0.2   | 45   | 62%  | 40 | 26.1 | 3.2 |
| Luetkens et al                 | 2017 | P | Philips | 1.5 | MOLLI   | 3 (3)3 (3)5 | 50 | 10   | Gadovist   | 0.2   | 35   | 66%  | 41 | 26.7 | 4.8 |
| Mayr et al                     | 2016 | P | Siemens | 1.5 | MOLLI   | 3 (3)3 (3)5 |    | 20   | Magnevist  | 0.15  | 20   |      |    | 25.0 | 1.1 |
| Mehta et al                    | 2015 | P | Siemens | 1.5 | MOLLI   | 5 (4)3      | 35 | 25   | Magnevist  | 0.15  | 10   | 80%  | 24 | 27.1 | 1.4 |
| Miller et al; subgroup 1       | 2013 | P | Siemens | 1.5 | MOLLI   | 3 (3)3 (3)5 | 35 | 15   | Magnevist  | 0.2   | 10   | 50%  | 46 | 25.8 | 2.8 |
| Miller et al; subgroup 2       | 2013 | P | Siemens | 1.5 | MOLLI   | 3 (3)3 (3)5 | 35 | 15   | Magnevist  | 0.15  | 10   | 50%  | 45 | 25.8 | 3.4 |
| Miller et al; subgroup 3       | 2013 | P | Siemens | 1.5 | MOLLI   | 3 (3)3 (3)5 | 35 | 15   | Magnevist  | 0.1   | 10   | 50%  | 44 | 27.7 | 3.7 |
| Mordi et al                    | 2016 | P | Siemens | 1.5 | MOLLI   | 3 (3)3 (3)5 | 35 | 10   | Gadovist   | 0.15  | 21   | 100% | 48 | 26.2 | 2.9 |
| Ntusi et al                    | 2014 | P | Siemens | 1.5 | ShMOLLI | 5 (1)1 (1)  | 35 | 20   | Dotarem    | 0.15  | 20   | 5%   | 56 | 27.6 | 2.5 |
| Ntusi et al                    | 2015 | P | Siemens | 1.5 | ShMOLLI | 5 (1)1 (1)  | 35 | 20   | Dotarem    | 0.15  | 39   | 72%  | 49 | 27.9 | 2.0 |
| Radunski et al                 | 2014 | P | Philips | 1.5 | MOLLI   | 3 (3)3 (3)5 | 35 | 15   | Multihance | 0.075 | 21   | 81%  | 34 | 25.0 | 1.1 |
| Radunski et al                 | 2017 | P | Philips | 1.5 | MOLLI   | 3 (3)5      | 35 | 15   | Multihance | 0.075 | 20   | 80%  | 37 | 26.0 | 1.1 |
| Radunski et al                 | 2017 | P | Philips | 1.5 | MOLLI   | 3 (3)5      | 35 | 15   | Multihance | 0.08  | 20   | 90%  | 31 | 25.0 | 1.0 |
| Rauhalaami et al               | 2016 | P | Siemens | 1.5 | MOLLI   | 3 (3)3 (3)5 | 50 | 12.5 | Magnevist  | 0.15  | 37   | 49%  | 58 | 25.0 | 2.3 |
| Roller et al                   | 2017 | P | Siemens | 1.5 | MOLLI   | 3 (3)3 (3)5 | 35 | 15   | Multihance | 0.15  | 24   | 50%  | 61 | 23.0 | 2.0 |
| Salerno et al; subgroup 1      | 2012 | P | Siemens | 1.5 | MOLLI   | 3 (3)5      | 35 | 30   | Magnevist  | 0.1   | 10   |      | 34 | 28.5 | 1.7 |
| Salerno et al; subgroup 2      | 2012 | P | Siemens | 1.5 | MOLLI   | 3 (3)3 (3)5 | 35 | 30   | Magnevist  | 0.1   | 10   |      | 34 | 28.5 | 1.8 |
| Schmacht et al                 | 2016 | P | Siemens | 1.5 | MOLLI   | 5 (3)3      | 50 | 15   | ProHance   | 0.2   | 17   | 29%  | 54 | 26.8 | 3.0 |
| Soslow et al                   | 2016 | P | Siemens | 1.5 | MOLLI   | 5 (3)3      | 35 | 15   | Magnevist  | 0.2   | 11   | 100% | 25 | 24.0 | 1.0 |
| Tahir et al                    | 2017 | P | Philips | 1.5 | MOLLI   | 5 (3)3      |    | 15   | Dotarem    | 0.2   | 36   | 61%  | 42 | 26.0 | 3.0 |
| Thuny et al                    | 2014 | P | Siemens | 1.5 | MOLLI   | 3 (3)3 (3)5 | 50 | 10   | Dotarem    | 0.2   | 16   | 50%  | 50 | 26.8 | 1.4 |
| Treibel et al                  | 2015 | P | Siemens | 1.5 | ShMOLLI | 5 (1)1 (1)  |    | 30   | Dotarem    | 0.1   | 50   | 52%  | 45 | 26.1 | 2.4 |
| Treibel et al                  | 2017 | P | Siemens | 1.5 | ShMOLLI | 5 (1)1 (1)1 | 35 |      | Dotarem    | 0.1   | 30   | 44%  | 41 | 28.0 | 2.9 |
| Ugander et al                  | 2012 | P | Siemens | 1.5 | MOLLI   | 3 (3)3 (3)5 | 35 | 17.5 | Magnevist  | 0.15  | 60   | 52%  | 49 | 26.0 | 3.0 |
| VanOoji et al                  | 2016 | P | Siemens | 1.5 | MOLLI   | 3 (3)3 (3)5 | 35 | 17.5 | Magnevist  | 0.1   | 10   | 60%  | 45 | 28.0 | 4.0 |
| Wang et al                     | 2017 | P | Siemens | 1.5 | MOLLI   | 5 (3)3      |    | 20   | Magnevist  | 0.2   | 97   | 71%  | 50 | 26.9 | 2.7 |
| Zorach et al                   | 2018 | P | Siemens | 1.5 | MOLLI   | 5 (4)3      | 35 | 15   | Magnevist  | 0.15  | 20   | 26%  | 58 | 27.1 | 2.2 |



Note.—Table of all extracellular volume (ECV) studies at 1.5 T. Method = recruitment method, P = prospectively recruited, R = retrospectively recruited, FS = field strength, Technique = pulse sequence scheme, MOLLI = Modified Look-Locker Inversion Recovery, ShMOLLI = Shortened Modified Look-Locker Inversion Recovery, Sequence = number of phases (number of heartbeats), FA = flip angle, PC time = time of measurement postcontrast injection, N = number of subjects in study, SD = standard deviation.

## B. ECV Studies at 3.0 T

| Author                      | Year | Method | Vendor  | FS (T) | Technique | Sequence    | FA (°) | PC Time (min) | Contrast   | Dose (mmol/kg) | N  | % Male | Age (years) | ECV Mean (%) | SD (%) |
|-----------------------------|------|--------|---------|--------|-----------|-------------|--------|---------------|------------|----------------|----|--------|-------------|--------------|--------|
| Child et al                 | 2017 | P      | Philips | 3      | MOLLI     | 3 (3)3 (2)5 | 50     | 25            | Gadovist   | 0.1            | 26 | 42%    | 53          | 26.0         | 4.0    |
| Chin et al                  | 2014 | P      | Siemens | 3      | MOLLI     | 3 (3)3 (3)5 | 35     | 20            | Gadovist   | 0.1            | 20 | 50%    | 55          | 26.0         | 1.6    |
| Chin et al                  | 2017 | P      | Siemens | 3      | MOLLI     | 3 (3)3 (3)5 | 50     | 20            | Gadovist   | 0.1            | 37 | 65%    | 68          | 26.5         | 1.3    |
| Costello et al              | 2017 | P      | Siemens | 3      | ShMOLLI   | 5 (1)1 (1)1 | 35     | 15            | Magnevist  | 0.2            | 57 | 51%    | 48          | 24.6         | 2.4    |
| Dabir et al; subgroup 3     | 2014 | P      | Philips | 3      | MOLLI     | 3 (3)3 (3)5 | 50     | 18            | Gadovist   | 0.15           | 55 | 51%    | 44          | 26.0         | 6.0    |
| Dabir et al; subgroup 4     | 2014 | P      | Philips | 3      | MOLLI     | 3 (3)3 (3)5 | 50     | 18            | Gadovist   | 0.15           | 32 | 52%    | 41          | 26.0         | 4.0    |
| Hong et al                  | 2015 | P      | Siemens | 3      | MOLLI     | 3 (3)3 (3)5 | 35     | 15            | Gadovist   | 0.2            | 10 | 70%    | 54          | 25.7         | 2.4    |
| Hromadka et al              | 2017 | P      | Siemens | 3      | MOLLI     | 5 (3)3      | 35     | 15            | Gadovist   | 0.05           | 20 | 50%    | 54          | 22.8         | 1.9    |
| Kawel et al; subgroup 1     | 2012 | P      | Siemens | 3      | MOLLI     | 3 (3)3 (3)5 | 35     | 30            | Magnevist  | 0.15           | 24 | 33%    | 28          | 29.0         | 3.0    |
| Kawel et al; subgroup 2     | 2012 | P      | Siemens | 3      | MOLLI     | 3 (3)3 (3)5 | 35     | 30            | Multihance | 0.1            | 24 | 33%    | 28          | 29.0         | 3.0    |
| Lee et al; subgroup 1       | 2011 | P      | Siemens | 3      | MOLLI     | 3 (3)5      | 35     | 23.5          | Magnevist  | 0.15           | 11 | 45%    | 36          | 25.8         | 4.1    |
| Lee et al; subgroup 2       | 2011 | P      | Siemens | 3      | MOLLI     | 3 (3)3 (3)5 | 35     | 23.5          | Magnevist  | 0.15           | 11 | 45%    | 36          | 26.3         | 3.8    |
| Levelt et al                | 2016 | P      | Siemens | 3      | MOLLI     | 3 (3)3 (3)5 | 35     | 15            |            |                | 20 | 45%    | 54          | 29.0         | 3.0    |
| Levelt et al                | 2017 | P      | Siemens | 3      | ShMOLLI   | 5 (1)1 (1)1 | 35     | 15            | Dotarem    | 0.03           | 16 | 53%    | 51          | 30.0         | 2.0    |
| Lin et al                   | 2018 | P      | Siemens | 3      | MOLLI     | 5 (3)3      | 20     | 20            |            |                | 20 | 50%    | 53          | 27.0         | 1.7    |
| Liu et al; subgroup 1       | 2012 | P      | Siemens | 3      | MOLLI     | 3 (3)5      | 35     | 25            | Multihance | 0.1            | 24 | 33%    | 29          | 26.4         | 2.9    |
| Liu et al; subgroup 2       | 2012 | P      | Siemens | 3      | MOLLI     | 3 (3)5      | 35     | 25            | Magnevist  | 0.15           | 24 | 33%    | 29          | 27.1         | 2.7    |
| Luetkens et al              | 2014 | P      | Philips | 3      | MOLLI     | 3 (3)3 (3)5 | 50     | 10            | Gadovist   | 0.2            | 42 | 64%    | 39          | 23.6         | 4.1    |
| Luetkens et al              | 2016 | P      | Philips | 3      | MOLLI     | 3 (3)3 (3)5 | 50     | 20            | Gadovist   | 0.2            | 22 | 68%    | 45          | 26.1         | 2.8    |
| McDiarmid et al             | 2016 | P      | Philips | 3      | MOLLI     | 5 (3)3      | 35     | 10            | Gadovist   | 0.15           | 15 | 100%   | 30          | 24.5         | 2.2    |
| McDiarmid et al; subgroup 1 | 2015 | P      | Philips | 3      | MOLLI     | 3 (3)3 (3)5 | 35     | 15            | Gadovist   | 0.15           | 10 | 70%    | 27          | 24.5         | 3.2    |
| McDiarmid et al; subgroup 2 | 2015 | P      | Philips | 3      | MOLLI     | 4 (3)3 (3)2 | 35     | 15            | Gadovist   | 0.15           | 10 | 70%    | 27          | 24.7         | 3.2    |
| McDiarmid et al; subgroup 3 | 2015 | P      | Philips | 3      | MOLLI     | 5 (3)3      | 35     | 15            | Gadovist   | 0.15           | 10 | 70%    | 27          | 24.8         | 3.9    |
| McDiarmid et al; subgroup 4 | 2015 | P      | Philips | 3      | MOLLI     | 3 (3)3 (3)5 | 50     | 15            | Gadovist   | 0.15           | 10 | 70%    | 27          | 25.0         | 3.3    |
| McDiarmid et al; subgroup 5 | 2015 | P      | Philips | 3      | MOLLI     | 4 (3)3 (3)2 | 50     | 15            | Gadovist   | 0.15           | 10 | 70%    | 27          | 25.3         | 4.0    |
| McDiarmid et al; subgroup 6 | 2015 | P      | Philips | 3      | MOLLI     | 5 (3)3      | 50     | 15            | Gadovist   | 0.15           | 10 | 70%    | 27          | 25.9         | 3.9    |
| Mordi et al                 | 2017 | P      | Philips | 3      | MOLLI     | 3 (3)3 (3)5 | 35     | 15            | Gadovist   | 0.15           | 28 | 50%    | 68          | 27.0         | 4.3    |
| Puntmann et al              | 2013 | P      | Philips | 3      | MOLLI     | 3 (3)5      | 50     | 17.5          | Gadovist   | 0.2            | 21 | 23%    | 38          | 26.0         | 5.0    |
| Puntmann et al              | 2013 | P      | Philips | 3      | MOLLI     | 3 (3)3 (3)5 | 50     | 20            | Gadovist   | 0.2            | 30 | 63%    | 43          | 26.0         | 7.0    |
| Puntmann et al              | 2017 | P      | Philips | 3      | MOLLI     | 3 (3)3 (3)5 | 50     | 15            | Gadovist   | 0.1            | 36 | 39%    | 43          | 25.0         | 6.0    |

|                   |      |   |         |   |       |             |    |    |           |      |     |     |    |      |     |
|-------------------|------|---|---------|---|-------|-------------|----|----|-----------|------|-----|-----|----|------|-----|
| Scally et al      | 2018 | P | Philips | 3 | MOLLI | 3 (3)3 (3)5 | 50 | 10 | Magnevist | 0.15 | 37  | 3%  | 64 | 27.0 | 1.0 |
| Schwarz et al     | 2017 | P | Philips | 3 | MOLLI | 3 (3)3 (3)5 | 50 | 15 | Gadovist  | 0.1  | 44  | 10% | 67 | 27.3 | 5.0 |
| Singh et al       | 2015 | P | Siemens | 3 | MOLLI | 3 (3)3 (3)5 | 50 | 20 | Gadovist  | 0.15 | 22  | 68% | 68 | 25.1 | 2.6 |
| Storz et al       | 2017 | P | Siemens | 3 | MOLLI | 5 (3)3      | 35 | 10 | Gadovist  | 0.2  | 218 | 50% | 54 | 24.6 | 2.8 |
| Weingartner et al | 2016 | P | Siemens | 3 | MOLLI | 5 (3)3      | 35 | 25 | Dotarem   | 0.2  | 20  | 50% | 27 | 27.5 | 3.1 |
| Wu et al          | 2016 | P | Philips | 3 | MOLLI | 3 (3)3 (3)5 | 35 | 15 | Magnevist | 0.15 | 14  | 57% | 51 | 24.0 | 3.0 |
| Wu et al          | 2017 | P | Philips | 3 | MOLLI | 5 (3)3      | 35 | 15 | Magnevist | 0.15 | 12  | 33% | 56 | 24.0 | 3.0 |
| Wu et al          | 2018 | P | Philips | 3 | MOLLI |             | 35 | 15 | Magnevist | 0.15 | 12  | 42% |    | 24.0 | 3.0 |
| Youn et al        | 2017 | P | Siemens | 3 | MOLLI | 3 (3)3 (3)5 | 35 | 15 | Gadovist  | 0.2  | 19  | 65% | 54 | 25.8 | 2.2 |
| Zhao et al        | 2016 | P | Siemens | 3 | MOLLI | 5 (3)3      | 35 | 15 | Magnevist | 0.1  | 13  | 77% | 53 | 25.1 | 1.6 |

Note.—Table of all extracellular volume (ECV) studies at 3.0 T. Method = recruitment method, P = prospectively recruited, R = retrospectively recruited, FS = field strength, Technique = pulse sequence scheme, MOLLI = Modified Look-Locker Inversion Recovery, ShMOLLI = Shortened Modified Look-Locker Inversion Recovery, Sequence = number of phases (number of heartbeats), FA = flip angle, PC time = time of measurement postcontrast injection, N = number of subjects in study, SD = standard deviation.

### Table E3: Pooled Covariance

#### A. Pooled Covariance of Native T1 Subgroups

|                | Pooled Covariance of Native T1 Subgroups |      |         |         |         |         |         |         |
|----------------|------------------------------------------|------|---------|---------|---------|---------|---------|---------|
| Field Strength | 1.5T                                     | 3.0T | 1.5T    | 1.5T    | 1.5T    | 3.0T    | 3.0T    | 3.0T    |
| Vendor         | All                                      | All  | Siemens | Siemens | Philips | Siemens | Siemens | Philips |
| Pulse Sequence | All                                      | All  | MOLLI   | ShMOLLI | MOLLI   | MOLLI   | ShMOLLI | MOLLI   |
| Pooled COV     | 0.04                                     | 0.03 | 0.04    | 0.03    | 0.03    | 0.03    | 0.02    | 0.03    |

#### B. Pooled Covariance of ECV Subgroups

|                | Pooled Covariance of ECV Subgroups |      |      |         |         |         |         |         |
|----------------|------------------------------------|------|------|---------|---------|---------|---------|---------|
| Field Strength | All                                | 1.5T | 3.0T | 1.5T    | 1.5T    | 1.5T    | 3.0T    | 3.0T    |
| Vendor         | All                                | All  | All  | Siemens | Siemens | Philips | Siemens | Philips |
| Pulse Sequence | All                                | All  | All  | MOLLI   | ShMOLLI | MOLLI   | MOLLI   | MOLLI   |
| Pooled COV     | 0.12                               | 0.12 | 0.16 | 0.12    | 0.10    | 0.15    | 0.10    | 0.18    |

COV = Covariance.

**Table E4: T1 and ECV Data from All Sequences and Vendors**

| Author            | Year | Vendor  | FS (T) | Technique          | Number of Subjects | % Males | Age (years) | Contrast   | Contrast Dose (mmol/kg) | PC Time (min) | Mean Native T1 (ms) | SD Native T1 (ms) | Mean ECV (%) | SD ECV (%) |
|-------------------|------|---------|--------|--------------------|--------------------|---------|-------------|------------|-------------------------|---------------|---------------------|-------------------|--------------|------------|
| Iles et al        | 2008 | GE      | 1.5    | prototype sequence | 20                 | 50      | 38          | Magnevist  | 0.20                    | 15            | 975                 | 62                |              |            |
| Gai et al         | 2011 | Siemens | 1.5    | Look-Locker        | 13                 | 54      | 38          | Magnevist  | 0.15                    | 25            | 986                 | 168               | 26.0         | 6.0        |
| Nacif et al       | 2011 | Siemens | 1.5    | Look-Locker        | 14                 | 57      | 38          |            |                         |               | 998                 | 196               |              |            |
| Sado et al        | 2012 | Siemens | 1.5    | FLASH IR           | 81                 | 52      | 43          | Dotarem    | 0.10                    |               |                     |                   | 25.3         | 3.5        |
| Song et al        | 2012 | GE      | 1.5    | MLLSR              | 41                 | 78      | 48          | ProHance   | 0.20                    | 10            | 910                 | 93                |              |            |
| Ho et al          | 2013 | Siemens | 3.0    | Look-Locker        | 11                 | 36      | 27          | Magnevist  | 0.15                    | 30            |                     |                   | 27.0         | 1.0        |
| Neilan et al      | 2013 | Siemens | 3.0    | Look-Locker        | 15                 | 47      | 56          | Magnevist  | 0.15                    | 30            |                     |                   | 28.0         | 2.0        |
| Neilan et al      | 2013 | Siemens | 3.0    | Look-Locker        | 32                 | 56      | 49          | Magnevist  | 0.15                    | 30            |                     |                   | 28.0         | 3.0        |
| Chow et al        | 2014 | Siemens | 1.5    | SASHA              | 10                 | 60      | 54          | Gadovist   | 0.15                    | 24            | 1170                | 9                 |              |            |
| Neilan et al      | 2014 | Siemens | 3.0    | Look-Locker        | 20                 | 65      | 57          | Magnevist  | 0.15                    | 30            |                     |                   | 28.0         | 3.0        |
| Barison et al     | 2015 | GE      | 1.5    | MCine-IR           | 15                 | 73      | 52          | Dotarem    | 0.20                    | 20            |                     |                   | 25.0         | 4.0        |
| Barison et al     | 2015 | GE      | 1.5    | MCine-IR           | 10                 | 0       | 48          | Omniscan   | 0.20                    | 15            | 811                 | 89                | 28.0         | 4.0        |
| Kato et al        | 2016 | Philips | 1.5    | STONE              | 15                 | 60      | 46          |            |                         |               | 1065                | 35                |              |            |
| Shah et al        | 2016 | Philips | 1.5    | STONE              | 27                 | 50      | 27          |            |                         |               | 1069                | 29                |              |            |
| Teixeira et al    | 2016 | Siemens | 3.0    | SASHA              | 40                 | 45      | 59          |            |                         |               | 1487                | 36                |              |            |
| Ngu et al         | 2016 | GE      | 1.5    | VAST               | 21                 | 52      | 36          | Magnevist  | 0.20                    | 20            | 1075                | 243               |              |            |
| Shah et al        | 2016 | Philips | 1.5    | STONE              | 20                 | 67      | 47          | Multihance | 0.10                    |               |                     |                   | 25.0         | 2.0        |
| Weingartner et al | 2016 | Siemens | 3.0    | SAPPHIRE           | 20                 | 50      | 27          | Dotarem    | 0.20                    | 25            | 1578                | 36                | 21.0         | 2.8        |
| Weingartner et al | 2016 | Siemens | 3.0    | SASHA              | 20                 | 50      | 27          | Dotarem    | 0.20                    | 25            | 1523                | 41                | 21.9         | 3.0        |
| Luetkens et al    | 2016 | Philips | 1.5    | ShMOLLI            | 50                 | 60      | 39          | Gadovist   | 0.20                    | 12            | 831                 | 27                | 25.3         | 4.0        |
| Roux et al        | 2017 | GE      | 1.5    | MOLLI              | 10                 | 30      | 35          | Dotarem    | 0.20                    | 10            | 929                 | 80                |              |            |
| Costello et al    | 2017 | Siemens | 3.0    | SASHA              | 57                 | 51      | 48          | Magnevist  | 0.20                    | 15            | 1498                | 44                | 19.8         | 1.9        |
| Vansanji et al    | 2017 | Siemens | 1.5    | SASHA              | 14                 | 57      | 51          | Magnevist  | 0.15                    | 20            | 1172                | 43                | 20.1         | 2.0        |
| Child et al       | 2017 | Philips | 3.0    | SASHA              | 26                 | 42      | 53          | Gadovist   | 0.10                    | 25            | 1171                | 42                | 26.0         | 8.0        |
| Child et al       | 2017 | Philips | 3.0    | ShMOLLI            | 26                 | 42      | 53          | Gadovist   | 0.10                    | 25            | 1080                | 32                | 26.0         | 6.0        |

Note.—Table of studies excluded for vendor or pulse sequence scheme, due to inadequate study group numbers for inclusion. ECV = extracellular volume, Native T1 = native t1 time, FS = field strength, Technique = pulse sequence scheme, FLASH IR = Fast Low Angle SHot inversion recovery, MLLSR = Modified Look-Locker acquisition with Saturation Recovery, SASHA = Saturation recovery single-shot acquisition, MCine-IR = Modified Cine Inversion Recovery, STONE = Slice interleaved T1 mapping, VAST = inversion recovery gradient echo sequence with variable sampling of the k-space time, SAPPHIRE = Saturation Pulse Prepared Heart Rate independent Inversion-REcovery, ShMOLLI = Shortened Modified Look-Locker Inversion Recovery, MOLLI = Modified Look-Locker Inversion Recovery, PC time = time of measurement postcontrast injection, N = number of subjects in study, SD = standard deviation.
